# Supplementary material
Source: MDPI journal article supplement (https://www.mdpi.com/2571-8789/3/2/23)
Supplement: s1 [file s1]

| Parameters              | Description                                                                                            |
|-------------------------|--------------------------------------------------------------------------------------------------------|
| Citation                | Publication where data were collected from                                                             |
| No.                     | Observation number                                                                                     |
| Number of observation   | Number of observations for each publication                                                            |
| Reference no.           | Reference number as shown in the References S1 section                                                 |
| Land type               | Land type of the study using the following categories: Agriculture, Forest, Grassland, Wetland, Desert |
| Study area Country      | Country name where the study was conducted                                                             |
| Soil description        | Soil description includes soil classification and soil texture                                         |
| Soil pH                 | Soil pH is the pH of the studied soil                                                                  |
| Soil C                  | Soil C is the available C of the studied soils                                                         |
| Soil N                  | Soil N is the available N of the studied soils                                                         |
| Unit                    | Unit is the measuring unit                                                                             |
| Biocide type            | Biocide type means fungicide and bactericide                                                           |
| Biocide name            | Biocide name includes different types of biocides                                                      |
| Biocide amount          | Biocide amount is the amount of biocides                                                               |
| Unit                    | Unit is a measurement variable                                                                         |
| Total Incub. period (d) | Total incub. Period (d) means the total incubation time expressed in day                               |
| Incub. Tem°C            | Incubation temperature is the temperature during the incubation periods                                |
| Incub. time             | Incubation time is the available time for incubation                                                   |
| Unit                    | Unit is a measurement variable                                                                         |
| Replicate               | Replicate is the number of replication                                                                 |
| Mean MBC control        | Mean value of MBC (microbial biomass carbon) in the control                                            |
| Mean MBC treatment      | Mean value of MBC in the treatment                                                                     |
| Mean MBC unit           | Measurement variable for mean MBC                                                                      |
| Mean MBC lnRR           | Natural log of response ratio for mean MBC                                                             |
| SD MBC control          | Standard deviation of MBC in the control                                                               |
| SD MBC treatment        | Standard deviation of MBC in the treatment                                                             |
| Mean MBN control        | Mean value of MBN (microbial biomass nitrogen) in the control                                          |
| Mean MBN treatment      | Mean value of MBN in the treatment                                                                     |
| Mean MBN unit           | Measurement variable for mean MBN                                                                      |
| Mean MBN lnRR           | Natural log of response ratio for MBN                                                                  |
| SD MBN control          | Standard deviation of MBN in the control                                                               |
| SD MBN treatment        | Standard deviation of MBN in the treatment                                                             |
| Mean Res. control       | Mean value of Res. (respiration) in the control                                                        |

|                                              |                                                                     |
|----------------------------------------------|---------------------------------------------------------------------|
| Mean Res. treatment                          | Mean value of respiration in the treatment                          |
| Mean Res. unit                               | Measurement variable for mean respiration                           |
| Mean Res. lnRR                               | Natural log of response ratio for respiration                       |
| SD Res. control                              | Standard deviation of respiration in the control                    |
| SD Res. treatment                            | Standard deviation of respiration in the treatment                  |
| Mean N <sub>2</sub> O_control                | Mean value of N <sub>2</sub> O in the control                       |
| Mean N <sub>2</sub> O_treatment              | Mean value of N <sub>2</sub> O in the treatment                     |
| Mean N <sub>2</sub> O_unit                   | Measurement variable for mean N <sub>2</sub> O                      |
| Mean N <sub>2</sub> O_lnRR                   | Natural log of response ratio for N <sub>2</sub> O                  |
| SD N <sub>2</sub> O_control                  | Standard deviation of N <sub>2</sub> O in the control               |
| SD N <sub>2</sub> O_treatment                | Standard deviation of N <sub>2</sub> O in the treatment             |
| Mean NH <sub>4</sub> <sup>+</sup> _control   | Mean value of NH <sub>4</sub> <sup>+</sup> in the control           |
| Mean NH <sub>4</sub> <sup>+</sup> _treatment | Mean value of NH <sub>4</sub> <sup>+</sup> in the treatment         |
| Mean NH <sub>4</sub> <sup>+</sup> _unit      | Measurement value for mean NH <sub>4</sub> <sup>+</sup>             |
| Mean NH <sub>4</sub> <sup>+</sup> _lnRR      | Natural log of response ratio for NH <sub>4</sub> <sup>+</sup>      |
| SD NH <sub>4</sub> <sup>+</sup> _control     | Standard deviation of NH <sub>4</sub> <sup>+</sup> in the control   |
| SD NH <sub>4</sub> <sup>+</sup> _treatment   | Standard deviation of NH <sub>4</sub> <sup>+</sup> in the treatment |
| Mean NO <sub>3</sub> <sup>-</sup> _control   | Mean value of NO <sub>3</sub> <sup>-</sup> in the control           |
| Mean NO <sub>3</sub> <sup>-</sup> _treatment | Mean value of NO <sub>3</sub> <sup>-</sup> in the treatment         |
| Mean NO <sub>3</sub> <sup>-</sup> _unit      | Measurement value for mean NO <sub>3</sub> <sup>-</sup>             |
| Mean NO <sub>3</sub> <sup>-</sup> _lnRR      | Effect size of mean NO <sub>3</sub> <sup>-</sup>                    |
| SD NO <sub>3</sub> <sup>-</sup> _control     | Standard deviation of NO <sub>3</sub> <sup>-</sup> in the control   |
| SD NO <sub>3</sub> <sup>-</sup> _treatment   | Standard deviation of NO <sub>3</sub> <sup>-</sup> in the treatment |
| Mean Ammon. control                          | Mean value of ammonification in the control                         |
| Mean Ammon. treatment                        | Mean value of ammonification in the treatment                       |
| Mean Ammon. unit                             | Measuring unit of mean ammonification                               |
| Mean Ammon. lnRR                             | Natural log of response ratio for ammonification                    |
| SD Ammon. control                            | Standard deviation of ammonification in the control                 |
| SD Ammon. treatment                          | Standard deviation of ammonification in the control                 |
| Mean Nitri. control                          | Mean value of nitrification in the control                          |
| Mean Nitri. treatment                        | Mean value of nitrification in the treatment                        |

|                     |                                                      |
|---------------------|------------------------------------------------------|
| Mean Nitri. unit    | Measurement variable for mean nitrification          |
| Mean Nitri. lnRR    | Natural log of response ratio for nitrification      |
| SD Nitri. control   | Standard deviation of nitrification in the control   |
| SD Nitri. treatment | Standard deviation of nitrification in the treatment |
