# Supplementary material
Source: MDPI journal article supplement (https://www.mdpi.com/2571-8789/3/2/23)
Supplement: s1 [file s1]

### Supplementary Information

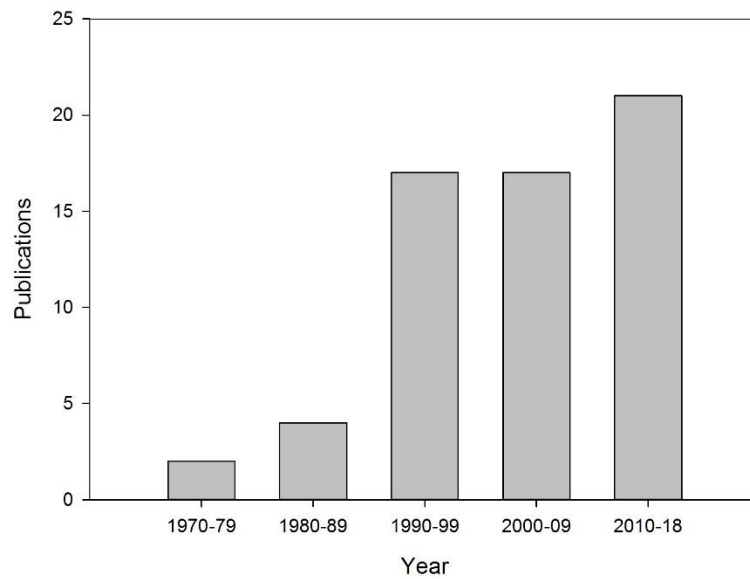

**Figure S1.** Number of publications with time used in our meta-analysis.

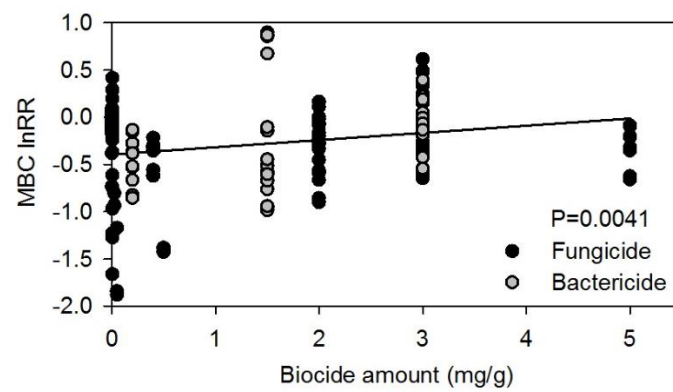

**Figure S2.** The response ratio of MBC in relation to biocide amount.

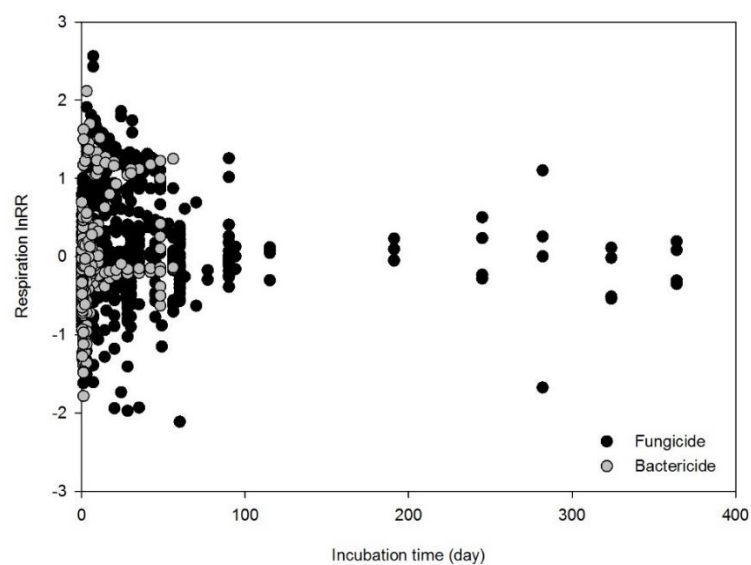

**Figure S3.** The response ratio of soil respiration in relation to incubation time.

**Table S1.** Selected keywords for this meta-analysis.

| No. | Keywords                    |
|-----|-----------------------------|
| 1   | "microbial biomass"         |
| 2   | biocide                     |
| 3   | "biomass carbon"            |
| 4   | fungi and bacteria          |
| 5   | "carbon cycle"              |
| 6   | "nitrogen cycle"            |
| 7   | "microbial carbon"          |
| 8   | fungicide                   |
| 9   | bactericide                 |
| 10  | antibiotics                 |
| 11  | "microbial nitrogen"        |
| 12  | "microbial respiration"     |
| 13  | "fungicide and bactericide" |
| 14  | "soil respir*"              |
| 15  | "nitrogen minerali*"        |
| 16  | "nitrous oxide"             |
| 17  | nitrificat*                 |
| 18  | denitrificat*               |

**Table S2.** Country-wise application of different biocides.

| Biocide name            | Country & no. of publication |        |     |    |       |       |         |       |        |         |            |            |          |        |       |           |        |         | Total publications |
|-------------------------|------------------------------|--------|-----|----|-------|-------|---------|-------|--------|---------|------------|------------|----------|--------|-------|-----------|--------|---------|--------------------|
|                         | China                        | Canada | USA | UK | India | Italy | Ireland | Japan | Poland | Germany | New Mexico | Luxembourg | Scotland | Russia | Spain | Australia | France | Denmark |                    |
| Azoxystrobin (F)        | 1                            |        | 1   |    |       |       |         |       |        |         |            |            |          |        |       |           |        |         | 2                  |
| Benomyl (F)             |                              |        | 5   |    |       |       |         |       |        |         |            |            |          |        |       |           |        |         | 5                  |
| Boscalid (F)            | 1                            |        |     |    |       |       |         |       |        |         |            |            |          |        |       |           |        |         | 1                  |
| Captan (F)              | 1                            |        | 8   | 3  | 1     |       |         |       | 1      | 1       |            |            |          |        |       |           |        |         | 15                 |
| Carbendazim (F)         | 2                            |        |     |    | 1     |       |         |       |        |         |            |            |          |        |       |           |        |         | 3                  |
| Chlorothalonil (F)      | 3                            |        | 4   |    |       |       |         |       |        |         |            |            |          |        |       |           |        |         | 7                  |
| Cu oxychloride (F)      |                              |        |     |    | 1     |       |         |       |        |         |            |            |          |        |       |           |        |         | 1                  |
| Cu ammonium acetate (F) |                              |        |     |    |       |       |         |       |        |         |            |            |          |        |       | 1         |        |         | 1                  |
| Cycloheximide (F)       | 1                            | 1      | 6   |    |       | 2     | 1       | 1     |        |         | 1          | 1          | 3        | 1      |       |           |        |         | 18                 |
| Cyprodinil (F)          |                              |        |     |    |       | 1     |         |       |        |         |            |            |          |        |       |           |        |         | 1                  |
| Dexon (F)               |                              |        |     |    | 1     |       |         |       |        |         |            |            |          |        |       |           |        |         | 1                  |
| Difenoconazole (F)      |                              |        |     |    |       |       |         |       |        |         |            |            |          |        | 2     |           |        |         | 2                  |
| Epoxiconazole (F)       |                              |        |     | 1  |       |       |         |       |        |         |            |            |          |        |       |           |        |         | 1                  |
| Hexaconazole (F)        | 1                            |        |     |    |       |       |         |       |        |         |            |            |          |        |       |           |        |         | 1                  |
| Impact Super (F)        |                              |        |     |    |       |       |         |       | 1      |         |            |            |          |        |       |           |        |         | 1                  |
| Iprodione (F)           | 1                            |        |     |    |       |       |         |       |        |         |            |            |          |        |       |           |        |         | 1                  |
| Lime-sulfur (F)         |                              |        | 1   |    |       |       |         |       |        |         |            |            |          |        |       |           |        |         | 1                  |
| Mancozeb (F)            |                              |        | 3   |    | 1     |       |         |       |        |         |            |            |          |        |       |           | 1      |         | 5                  |
| Maneb (F)               |                              |        | 1   |    |       |       |         |       |        |         |            |            |          |        |       |           |        |         | 1                  |
| Mefenoxam (F)           |                              |        |     |    |       |       |         |       |        | 1       |            |            |          |        |       |           |        |         | 1                  |
| Metalaxyl (F)           |                              |        |     |    |       |       |         |       |        | 1       |            |            |          |        |       |           |        |         | 1                  |
| Mirage (F)              |                              |        |     |    |       |       |         |       | 1      |         |            |            |          |        |       |           |        |         | 1                  |
| Nitrapyrin (F)          |                              |        | 1   |    |       |       |         |       |        |         |            |            |          |        |       |           |        |         | 1                  |
| Penconazole (F)         |                              |        |     |    |       | 1     |         |       |        |         |            |            |          |        |       |           |        |         | 1                  |

| Biocide name                     | Country & no. of publication |        |     |    |       |       |         |       |        |         |            |            |          |        |       |           |        |         | Total publications |
|----------------------------------|------------------------------|--------|-----|----|-------|-------|---------|-------|--------|---------|------------|------------|----------|--------|-------|-----------|--------|---------|--------------------|
|                                  | China                        | Canada | USA | UK | India | Italy | Ireland | Japan | Poland | Germany | New Mexico | Luxembourg | Scotland | Russia | Spain | Australia | France | Denmark |                    |
| Pentachlorophenol (F)            |                              |        |     |    |       | 1     |         |       |        |         |            |            |          |        |       |           |        |         | 1                  |
| Propiconazole (F)                |                              |        |     |    |       |       |         |       |        |         |            |            |          |        |       |           |        | 1       | 1                  |
| Pyraclostrobin (F)               |                              |        | 1   |    |       |       |         |       |        |         |            |            |          |        |       |           |        |         | 1                  |
| Pyrimorph (F)                    | 1                            |        |     |    |       |       |         |       |        |         |            |            |          |        |       |           |        |         | 1                  |
| Tebuconazole (F)                 | 1                            |        |     |    |       |       |         |       |        |         |            |            |          |        | 1     |           |        |         | 2                  |
| Terrazole (F)                    |                              |        | 2   |    |       |       |         |       |        |         |            |            |          |        |       |           |        |         | 2                  |
| Tridemorph (F)                   |                              |        |     |    | 1     |       |         |       |        |         |            |            |          |        |       |           |        |         | 1                  |
| Triadimefon (F)                  |                              |        |     | 1  |       |       |         |       |        |         |            |            |          |        |       |           |        |         | 1                  |
| Thiram (F)                       |                              |        | 1   | 1  |       |       |         |       |        |         |            |            |          |        |       |           |        |         | 2                  |
| Verdasan (F)                     |                              |        |     | 1  |       |       |         |       |        |         |            |            |          |        |       |           |        |         | 1                  |
| Vinclozolin (F)                  |                              |        |     |    |       |       |         |       |        |         |            |            |          | 1      |       |           |        |         | 1                  |
| Bronopol (B)                     | 1                            |        | 1   | 2  |       |       |         |       |        |         |            |            |          |        |       |           |        |         | 4                  |
| Oxytetracycline (B)              |                              |        | 2   |    |       |       |         |       | 1      |         |            |            |          |        |       |           |        |         | 3                  |
| Streptomycin (B)                 | 1                            | 1      | 5   |    |       | 2     | 1       | 1     |        |         | 1          | 1          | 1        |        |       |           |        |         | 14                 |
| Captan+Bronopol (F+B)            |                              |        |     | 1  |       |       |         |       |        |         |            |            |          |        |       |           |        |         | 1                  |
| Captan+Oxytetracycline (F+B)     |                              |        | 1   |    |       |       |         |       |        |         |            |            |          |        |       |           |        |         | 1                  |
| Cycloheximide+Streptomycin (F+B) | 1                            | 1      | 3   |    |       | 2     |         |       |        |         |            |            |          |        |       |           |        |         | 7                  |

Note: F = fungicide, B = bactericide, F+B = fungicide+bactericide

**Table S3.** Chemical structure of studied biocides.

| No. | Biocide name        | Biocide type | Molecular formula                                                                                                                              | Total atomic mass | CAS Registry Number     | N%   | C/N |
|-----|---------------------|--------------|------------------------------------------------------------------------------------------------------------------------------------------------|-------------------|-------------------------|------|-----|
| 1   | Azoxystrobin        | Fungicide    | C <sub>22</sub> H <sub>17</sub> N <sub>3</sub> O <sub>5</sub>                                                                                  | 403               | 131860-33-8             | 10.4 | 6   |
| 2   | Benomyl             | Fungicide    | C <sub>14</sub> H <sub>18</sub> N <sub>4</sub> O <sub>3</sub>                                                                                  | 290               | 17804-35-2              | 19.3 | 3   |
| 3   | Boscalid            | Fungicide    | C <sub>18</sub> H <sub>12</sub> Cl <sub>2</sub> N <sub>2</sub> O                                                                               | 343               | 188425-85-6             | 8.2  | 8   |
| 4   | Captan              | Fungicide    | C <sub>9</sub> H <sub>8</sub> Cl <sub>3</sub> NO <sub>2</sub> S                                                                                | 300               | 133-06-2                | 4.7  | 8   |
| 5   | Carbendazim         | Fungicide    | C <sub>9</sub> H <sub>9</sub> N <sub>3</sub> O <sub>2</sub>                                                                                    | 191               | 10605-21-7              | 22.0 | 3   |
| 6   | Chlorothalonil      | Fungicide    | C <sub>8</sub> Cl <sub>4</sub> N <sub>2</sub>                                                                                                  | 266               | 1897-45-6               | 10.5 | 3   |
| 7   | Cu Oxychloride      | Fungicide    | Cl <sub>2</sub> Cu <sub>2</sub> H <sub>3</sub> O <sub>3</sub> <sup>-</sup>                                                                     | 249               | 1332-40-7               | 0    | n/a |
| 8   | Cu ammonium acetate | Fungicide    | C <sub>4</sub> H <sub>10</sub> CuNO <sub>4</sub>                                                                                               | 200               | 43043-77-2              | 7.0  | 3   |
| 9   | Cycloheximide       | Fungicide    | C <sub>15</sub> H <sub>23</sub> NO <sub>4</sub>                                                                                                | 281               | 66-81-9                 | 5.0  | 13  |
| 10  | Cyprodinil          | Fungicide    | C <sub>14</sub> H <sub>15</sub> N <sub>3</sub>                                                                                                 | 225               | 121552-61-2             | 18.7 | 4   |
| 11  | Dexon               | Fungicide    | C <sub>8</sub> H <sub>10</sub> N <sub>3</sub> NaO <sub>3</sub> S                                                                               | 251               | 140-56-7                | 16.7 | 2   |
| 12  | Difenoconazole      | Fungicide    | C <sub>19</sub> H <sub>17</sub> Cl <sub>2</sub> N <sub>3</sub> O <sub>3</sub>                                                                  | 406               | 119446-68-3             | 10.4 | 5   |
| 13  | Epoxiconazole       | Fungicide    | C <sub>17</sub> H <sub>13</sub> ClFN <sub>3</sub> O                                                                                            | 329               | 133855-98-8             | 12.8 | 5   |
| 14  | Hexaconazole        | Fungicide    | C <sub>14</sub> H <sub>17</sub> Cl <sub>2</sub> N <sub>3</sub> O                                                                               | 316               | 79983-71-4              | 13.3 | 4   |
| 15  | Impact Super        | Fungicide    | C <sub>16</sub> H <sub>13</sub> F <sub>2</sub> N <sub>3</sub> O (flutriafol)+<br>C <sub>8</sub> Cl <sub>4</sub> N <sub>2</sub> (chlorthalonil) | 447               | 76674-21-0<br>1897-45-6 | 15.7 | 4   |
| 16  | Iprodione           | Fungicide    | C <sub>13</sub> H <sub>13</sub> Cl <sub>2</sub> N <sub>3</sub> O <sub>3</sub>                                                                  | 336               | 36734-19-7              | 12.5 | 4   |
| 17  | Lime-sulfur         | Fungicide    | CaS <sub>x</sub> (X=2-7)                                                                                                                       | 104-265           | 1344-81-6               | 0    | n/a |
| 18  | Mancozeb            | Fungicide    | C <sub>4</sub> H <sub>6</sub> N <sub>2</sub> S <sub>4</sub> Mn                                                                                 | 265               | 8018-01-7               | 10.6 | 2   |
| 19  | Maneb               | Fungicide    | (C <sub>4</sub> H <sub>6</sub> MnN <sub>2</sub> S <sub>4</sub> ) <sub>n</sub>                                                                  | 265               | 12427-38-2              | 10.6 | 2   |
| 20  | Metalaxyl           | Fungicide    | C <sub>15</sub> H <sub>21</sub> NO <sub>4</sub>                                                                                                | 279               | 57837-19-1              | 5.0  | 13  |
| 21  | Mefenoxam           | Fungicide    | C <sub>15</sub> H <sub>21</sub> NO <sub>4</sub>                                                                                                | 279               | 70630-17-0              | 5.0  | 13  |
| 22  | Mirage              | Fungicide    | C <sub>15</sub> H <sub>16</sub> Cl <sub>3</sub> N <sub>3</sub> O <sub>2</sub>                                                                  | 376               | 67747-09-5              | 11.2 | 4   |
| 23  | Nitrapyrin          | Fungicide    | C <sub>6</sub> H <sub>3</sub> Cl <sub>4</sub> N                                                                                                | 231               | 1929-82-4               | 6.1  | 5   |
| 24  | Penconazole         | Fungicide    | C <sub>13</sub> H <sub>15</sub> Cl <sub>2</sub> N <sub>3</sub>                                                                                 | 284               | 66246-88-6              | 14.8 | 4   |
| 25  | Pentachlorophenol   | Fungicide    | C <sub>6</sub> HCl <sub>5</sub> O                                                                                                              | 266               | 87-86-5                 | 0    | n/a |

| No. | Biocide name    | Biocide type | Molecular formula        | Total atomic mass | CAS Registry Number | N%   | C/N |
|-----|-----------------|--------------|--------------------------|-------------------|---------------------|------|-----|
| 26  | Propiconazole   | Fungicide    | $C_{15}H_{17}Cl_2N_3O_2$ | 342               | 60207-90-1          | 12.3 | 4   |
| 27  | Pyraclostrobin  | Fungicide    | $C_{19}H_{18}ClN_3O_4$   | 387               | 175013-18-0         | 10.8 | 5   |
| 28  | Pyrimorph       | Fungicide    | $C_{22}H_{25}ClN_2O_2$   | 384               | 868390-90-3         | 7.3  | 9   |
| 29  | Tebuconazole    | Fungicide    | $C_{16}H_{22}ClN_3O$     | 307               | 107534-96-3         | 13.7 | 5   |
| 30  | Terrazole       | Fungicide    | $C_5H_5Cl_3N_2OS$        | 247               | 2593-15-9           | 11.3 | 2   |
| 31  | Tridemorph      | Fungicide    | $C_{19}H_{39}NO$         | 297               | 24602-86-6          | 4.7  | 16  |
| 32  | Triadimefon     | Fungicide    | $C_{14}H_{16}ClN_3O_2$   | 293               | 43121-43-3          | 14.3 | 4   |
| 33  | Thiram          | Fungicide    | $C_6H_{12}N_2S_4$        | 240               | 137-26-8            | 11.7 | 3   |
| 34  | Verdasan        | Fungicide    | $C_8H_8HgO_2$            | 337               | 62-38-4             | 0    | n/a |
| 35  | Vinclozolin     | Fungicide    | $C_{12}H_9Cl_2NO_3$      | 286               | 50471-44-8          | 4.9  | 10  |
| 36  | Bronopol        | Bactericide  | $C_3H_6BrNO_4$           | 200               | 52-51-7             | 7.0  | 3   |
| 37  | Oxytetracycline | Bactericide  | $C_{22}H_{24}N_2O_9$     | 460               | 79-57-2             | 6.1  | 9   |
| 38  | Streptomycin    | Bactericide  | $C_{21}H_{39}N_7O_{12}$  | 581               | 57-92-1             | 16.9 | 3   |

### References S1: References used in meta-analysis

1. Ananyeva, N.D.; Ivashchenko, K.V.; Stolnikova, E.V.; Stepanov, A.L.; Kudiyarov, V.N. Specific features of determination of the net production of nitrous oxide by soils. *Eurasian Soil Sci.* **2015**, *48*, 608–619. doi:10.1134/S1064229315060022.
2. Badalucco, L.; Pomare, F.; Grego, S.; Landi, L.; Nannipieri, P. Activity and degradation of streptomycin and cycloheximide in soil. *Biol. Fertil. Soils* **1994**, *18*, 334–340. doi:10.1007/BF00570637.
3. Banerjee, A.; Banerjee, A.K. Effect of the fungicides tridemorph and vinclozolin on soil microorganisms and nitrogen metabolism. *Folia Microbiol.* **1991**, *36*, 567–571. doi:10.1007/BF02884038.
4. Banerjee, A.; Banerjee, A.K. Influence of captan on some microorganisms and microbial processes related to the nitrogen cycle. *Plant Soil* **1987**, *102*, 239–245. doi:10.1007/BF02370709.
5. Beare, M.H.; Hu, S.; Coleman, D.C.; Hendrix, P.F. Influences of mycelial fungi on soil aggregation and organic matter storage in conventional and no-tillage soils. *Appl. Soil Ecol.* **1997**, *5*, 211–219. doi:10.1016/S0929-1393(96)00142-4.
6. Beare, M.H.; Parmelee, R.W.; Hendrix, P.F.; Cheng, W.; Coleman, D.C.; Crossley Jr., D.A. Microbial and faunal interactions and effects on litter nitrogen and decomposition in agroecosystems. *Ecol. Monogr.* **1992**, *62*, 569–591. doi:10.2307/2937317.
7. Beare, M.H.; Neely, C.L.; Coleman, D.C.; Hargrove, W.L. A substrate-induced respiration (SIR) method for measurement of fungal and bacterial biomass on plant residues. *Soil Biol. Biochem.* **1990**, *22*, 585–594. doi:10.1016/0038-0717(90)90002-H.
8. Bosso, L.; Scelza, R.; Testa, A.; Cristinzio, G.; Rao, M.A. Depletion of pentachlorophenol contamination in an agricultural soil treated with *Byssoschlamys nivea*, *Scopulariopsis brumptii* and urban waste compost: a laboratory microcosm study. *Water Air Soil Pollut.* **2015**, *226*, 183. doi:10.1007/s11270-015-2436-0.
9. Boyle, S.A.; Yarwood, R.R.; Bottomley, P.J.; Myrold, D.D. Bacterial and fungal contributions to soil nitrogen cycling under Douglas fir and red alder at two sites in Oregon. *Soil Biol. Biochem.* **2008**, *40*, 443–451. doi:10.1016/j.soilbio.2007.09.007.
10. Castaldi, S.; Smith, K.A. Effect of cycloheximide on N<sub>2</sub>O and NO<sub>3</sub><sup>-</sup> production in a forest and an agricultural soil. *Biol. Fertil. Soils* **1998**, *27*, 27–34. doi:10.1007/s003740050395.
11. Chen, S.-K.; Edwards, C.A.; Subler, S. Effects of the fungicides benomyl, captan and chlorothalonil on soil microbial activity and nitrogen dynamics in laboratory incubations. *Soil Biol. Biochem.* **2001**, *33*, 1971–1980. doi:10.1016/S0038-0717(01)00131-6.
12. Chen, S.-K.; Edwards, C.A. A microcosm approach to assess the effects of fungicides on soil ecological processes and plant growth: comparisons of two soil types. *Soil Biol. Biochem.* **2001**, *33*, 1981–1991. doi:10.1016/S0038-0717(01)00132-8.
13. Chen, S.-K.; Edwards, C.A.; Subler, S. A microcosm approach for evaluating the effects of the fungicides benomyl and captan on soil ecological processes and plant growth. *Appl. Soil Ecol.* **2001**, *18*, 69–82. doi:10.1016/S0929-1393(01)00135-4.
14. Crenshaw, C.L.; Lauber, C.; Sinsabaugh, R.L.; Staveland, L.K. Fungal control of nitrous oxide production in semiarid grassland. *Biogeochemistry* **2008**, *87*, 17–27. doi:10.1007/s10533-007-9165-4.
15. Daniel, D.W.; Smith, L.M.; Belden, J.B.; McMurry, S.T.; Swain, S. Effects of land-use change and fungicide application on soil respiration in playa wetlands and adjacent uplands of the U.S. High Plains. *Sci. Total Environ.* **2015**, *514*, 290–297. doi:10.1016/j.scitotenv.2015.01.066.
16. Doneche, B.; Seguin, G.; Ribereau-Gayon, P. Mancozeb effect on soil microorganisms and its degradation in soils. *Soil Science* **1983**, *135*, 361–366.
17. Elmholt, S. Effect of propiconazole on substrate amended soil respiration following laboratory and field application. *Pestic. Sci.* **1992**, *34*, 139–146. doi:10.1002/ps.2780340208.
18. Feeney, D.S.; Hallett, P.D.; Rodger, S.; Bengough, A.G.; White, N.A.; Young, I.M. Impact of fungal and bacterial biocides on microbial induced water repellency in arable soil. *Geoderma* **2006**, *135*, 72–80. doi:10.1016/j.geoderma.2005.11.007.
19. Golovleva, L.A.; Finkelstein, Z.I.; Polyakova, A.V.; Baskunov, B.P.; Nefedova, M.Y. Microbial conversion of fungicide vinclozolin. *J. Environ. Sci. Health* **1991**, *26*, 293–307. doi:10.1080/03601239109372736.
20. Griffiths, B.S. Enhanced nitrification in the presence of bacteriophagous protozoa. *Soil Biol. Biochem.* **1989**, *21*, 1045–1051. doi:10.1016/0038-0717(89)90042-4.

21. Hart, M.R.; Brookes, P.C. Effects of two ergosterol-inhibiting fungicides on soil ergosterol and microbial biomass. *Soil Biol. Biochem.* **1996**, *28*, 885–892. doi:10.1016/0038-0717(96)00071-5.
22. Helfrich, M.; Ludwig, B.; Potthoff, M.; Flessa, H. Effect of litter quality and soil fungi on macroaggregate dynamics and associated partitioning of litter carbon and nitrogen. *Soil Biol. Biochem.* **2008**, *40*, 1823–1835. doi:10.1016/j.soilbio.2008.03.006.
23. Hopkins, D.W.; Isabella, B.L.; Scott, S.E. Relationship between microbial biomass and substrate induced respiration in soils amended with D-and L-isomers of amino acids. *Soil Biol. Biochem.* **1994**, *26*, 1623–1627. doi:10.1016/0038-0717(94)90314-X.
24. Inagaki, Y.; Yamada, T. Properties of soil nitrogen mineralization and nitrification in mature plantations of Japanese Cedar (*Cryptomeria japonica*) and Hinoki Cypress (*Chamaecyparis obtusa*). *J. Jpn. For. Soc.* **2002**, *84*, 159–165. doi:10.11519/jjfs1953.84.3\_159.
25. Ju, C.; Xu, J.; Wu, X.; Dong, F.; Liu, X.; Tian, C.; Zheng, Y. Effects of hexaconazole application on soil microbes community and nitrogen transformations in paddy soils. *Sci. Total Environ.* **2017**, *609*, 655–663. doi:10.1016/j.scitotenv.2017.07.146.
26. Karanth, N.G.K.; Vasantharajan, V.N. Persistence and effect of dexton on soil respiration. *Soil Biol. Biochem.* **1973**, *5*, 679–684. doi:10.1016/0038-0717(73)90058-8.
27. Kaszubiak, H. A modifying impact of temperature on bacteria response to soil treatment with fungicides. *Pol. J. Environ. Stud.* **1999**, *8*, 395–401.
28. Kinney, C.A.; Mandernack, K.W.; Mosier, A.R. Laboratory investigations into the effects of the pesticides mancozeb, chlorothalonil, and prosulfuron on nitrous oxide and nitric oxide production in fertilized soil. *Soil Biol. Biochem.* **2005**, *37*, 837–850. doi:10.1016/j.soilbio.2004.07.044.
29. Kinney, C.A.; Mosier, A.R.; Ferrer, I.; Furlong, E.T.; Mandernack, K.W. Effects of the fungicides mancozeb and chlorothalonil on fluxes of CO<sub>2</sub>, N<sub>2</sub>O, and CH<sub>4</sub> in a fertilized Colorado grassland soil. *J. Geophys. Res.* **2004**, *109*, D05303. doi:10.1029/2003JD003655.
30. Kooijman, A.M.; Bloem, J.; van Dalen, B.R.; Kalbitz, K. Differences in activity and N demand between bacteria and fungi in a microcosm incubation experiment with selective inhibition. *Appl. Soil Ecol.* **2016**, *99*, 29–39. doi:10.1016/j.apsoil.2015.11.011.
31. Landi, L.; Badalucco, L.; Pomarè, F.; Nannipieri, P. Effectiveness of antibiotics to distinguish the contributions of fungi and bacteria to net nitrogen mineralization, nitrification and respiration. *Soil Biol. Biochem.* **1993**, *25*, 1771–1778. doi:10.1016/0038-0717(93)90182-B.
32. Laughlin, R.J.; Stevens, R.J. Evidence for fungal dominance of denitrification and codenitrification in a grassland soil. *Soil Sci. Soc. Am. J.* **2002**, *66*, 1540–1548. doi:10.2136/sssaj2002.1540.
33. Lee, D.; Han, X.G.; Jordan, C.F. Soil phosphorus fractions, aluminum, and water retention as affected by microbial activity in an Ultisol. *Plant Soil* **1990**, *121*, 125–136. doi:10.1007/BF00013105.
34. Lin, Q.; Brookes, P.C. Comparison of substrate induced respiration, selective inhibition and biovolume measurements of microbial biomass and its community structure in unamended, ryegrass-amended, fumigated and pesticide-treated soils. *Soil Biol. Biochem.* **1999**, *31*, 1999–2014. doi:10.1016/S0038-0717(99)00122-4.
35. Ma, S.; Shan, J.; Yan, X. N<sub>2</sub>O emissions dominated by fungi in an intensively managed vegetable field converted from wheat–rice rotation. *Appl. Soil Ecol.* **2017**, *116*, 23–29. doi:10.1016/j.apsoil.2017.03.021.
36. Majumdar, B.; Saha, A.R.; Sarkar, S.; Maji, B.; Mahapatra, B.S. Effect of herbicides and fungicides application on fibre yield and nutrient uptake by jute (*Corchorus olitorius*), residual nutrient status and soil quality. *Indian J. Agric. Sci.* **2010**, *80*, 878–883.
37. Man, L.; Zucong, C. Effects of chlorothalonil and carbendazim on nitrification and denitrification in soils. *J. Environ. Sci.* **2009**, *21*, 458–467.
38. Marusenko, Y.; Huber, D.P.; Hall, S.J. Fungi mediate nitrous oxide production but not ammonia oxidation in aridland soils of the southwestern US. *Soil Biol. Biochem.* **2013**, *63*, 24–36. doi:10.1016/j.soilbio.2013.03.018.
39. Merrington, G.; Rogers, S.L.; Van Zwieten, L. The potential impact of long-term copper fungicide usage on soil microbial biomass and microbial activity in an avocado orchard. *Aust. J. Soil Res.* **2002**, *40*, 749–759. doi:10.1071/SR01084.
40. Monkiedje, A.; Ilori, M.O.; Spiteller, M. Soil quality changes resulting from the application of the fungicides mefenoxam and metalaxyl to a sandy loam soil. *Soil Biol. Biochem.* **2002**, *34*, 1939–1948. doi:10.1016/S0038-0717(02)00211-0.



41. Muñoz-Leoz, B.; Garbisu, C.; Charcosset, J.Y.; Sánchez-Pérez, J.M.; Antigüedad, I.; Ruiz-Romera, E. Non-target effects of three formulated pesticides on microbially-mediated processes in a clay-loam soil. *Sci. Total Environ.* **2013**, *449*, 345–354. doi:10.1016/j.scitotenv.2013.01.079.
42. Muñoz-Leoz, B.; Garbisu, C.; Antigüedad, I.; Ruiz-Romera, E. Fertilization can modify the non-target effects of pesticides on soil microbial communities. *Soil Biol. Biochem.* **2012**, *48*, 125–134. doi:10.1016/j.soilbio.2012.01.021.
43. Muñoz-Leoz, B.; Ruiz-Romera, E.; Antigüedad, I.; Garbisu, C. Tebuconazole application decreases soil microbial biomass and activity. *Soil Biol. Biochem.* **2011**, *43*, 2176–2183. doi:10.1016/j.soilbio.2011.07.001.
44. Piotrowska-Seget, Z.; Engel, R.; Nowak, E.; Kozdrój, J. Successive soil treatment with captan or oxytetracycline affects non-target microorganisms. *World J. Microbiol. Biotechnol.* **2008**, *24*, 2843–2848. doi:10.1007/s11274-008-9815-2.
45. Puglisi, E.; Vasileiadis, S.; Demiris, K.; Bassi, D.; Karpouzas, D.G.; Capri, E.; Cocconcelli, P.S.; Trevisan, M. Impact of fungicides on the diversity and function of non-target ammonia-oxidizing microorganisms residing in a litter soil cover. *Microb. Ecol.* **2012**, *64*, 692–701. doi:10.1007/s00248-012-0064-4.
46. Rahman, M.T.; Zhu, Q.H.; Zhang, Z.B.; Zhou, H.; Peng, X. The roles of organic amendments and microbial community in the improvement of soil structure of a vertisol. *Appl. Soil Ecol.* **2017**, *111*, 84–93. doi:10.1016/j.apsoil.2016.11.018.
47. Scheu, S.; Parkinson, D. Changes in bacterial and fungal biomass C, bacterial and fungal biovolume and ergosterol content after drying, remoistening and incubation of different layers of cool temperate forest soils. *Soil Biol. Biochem.* **1994**, *26*, 1515–1525. doi:10.1016/0038-0717(94)90093-0.
48. Seo, D.C.; DeLaune, R.D. Effect of redox conditions on bacterial and fungal biomass and carbon dioxide production in Louisiana coastal swamp forest sediment. *Sci. Total Environ.* **2010**, *408*, 3623–3631. doi:10.1016/j.scitotenv.2010.04.043.
49. Somda, Z.C.; Mills, H.A.; Phatak, S.C. Influence of biocides on tomato nitrogen uptake and soil nitrification and denitrification. *J. Plant Nutrition* **1991**, *14*, 1187–1199. doi:10.1080/01904169109364277.
50. Stamatiadis, S.; Doran, J.W.; Ingham, E.R. Use of staining and inhibitors to separate fungal and bacterial activity in soil. *Soil Biol. Biochem.* **1990**, *22*, 81–88. doi:10.1016/0038-0717(90)90064-7.
51. Teng, Y.; Zhang, M.; Yang, G.; Wang, J.; Christie, P.; Luo, Y. Successive chlorothalonil applications inhibit soil nitrification and discrepantly affect abundances of functional genes in soil nitrogen cycling. *Environ. Sci. Pollut. Res.* **2017**, *24*, 3562–3571. doi:10.1007/s11356-016-8080-4.
52. Wainwright, M.; Pugh, G.J.F. The effect of three fungicides on nitrification and ammonification in soil. *Soil Biol. Biochem.* **1973**, *5*, 577–584. doi:10.1016/0038-0717(73)90047-3.
53. Wang, C.; Wang, F.; Zhang, Q.; Liang, W. Individual and combined effects of tebuconazole and carbendazim on soil microbial activity. *Eur. J. Soil Biol.* **2016**, *72*, 6–13. doi:10.1016/j.ejsobi.2015.12.005.
54. Wang, F.H.; Zhu, L.S.; Lv, D.D.; Guo, P.P.; Wang, J.; Wang, J.H. Effects of azoxystrobin on soil microorganisms and enzymatic activities. *Fresenius Environ. Bulletin* **2015**, *24*, 3336–3343.
55. Wilson, G.W.T.; Rice, C.W.; Rillig, M.C.; Springer, A.; Hartnett, D.C. Soil aggregation and carbon sequestration are tightly correlated with the abundance of arbuscular mycorrhizal fungi: results from long-term field experiments. *Ecol. Lett.* **2009**, *12*, 452–461. doi:10.1111/j.1461-0248.2009.01303.x.
56. Wu, X.; Yin, Y.; Wang, S.; Yu, Y. Accumulation of chlorothalonil and its metabolite, 4-hydroxychlorothalonil, in soil after repeated applications and its effects on soil microbial activities under greenhouse conditions. *Environ. Sci. Pollut. Res.* **2014**, *21*, 3452–3459. doi:10.1007/s11356-013-2318-1.
57. Xiao, C.; Fauci, M.; Bezdicek, D.F.; McKean, W.T.; Pan, W.L. Soil aggregation and microbial responses to straw pulping byproducts. *Soil Sci. Soc. Am. J.* **2008**, *72*, 1471–1477. doi:10.2136/sssaj2006.0361.
58. Xiong, D.; Li, Y.; Xiong, Y.; Li, X.; Xiao, Y.; Qin, Z.; Xiao, Y. Influence of boscalid on the activities of soil enzymes and soil respiration. *Eur. J. Soil Biol.* **2014**, *61*, 1–5. doi:10.1016/j.ejsobi.2013.12.006.
59. Xiong, D.; Gao, Z.; Fu, B.; Sun, H.; Tian, S.; Xiao, Y.; Qin, Z. Effect of pyrimorph on soil enzymatic activities and respiration. *Eur. J. Soil Biol.* **2013**, *56*, 44–48. doi:10.1016/j.ejsobi.2013.02.005.
60. Yeomans, J.C.; Bremner, J.M. Denitrification in soil: effects of insecticides and fungicides. *Soil Biol. Biochem.* **1985**, *17*, 453–456. doi:10.1016/0038-0717(85)90008-2.
61. Zhang, M.; Wang, W.; Bai, S.H.; Zhou, X.; Teng, Y.; Xu, Z. Antagonistic effects of nitrification inhibitor 3,4-dimethylpyrazole phosphate and fungicide iprodione on net nitrification in an agricultural soil. *Soil Biol. Biochem.* **2018**, *116*, 167–170. doi:10.1016/j.soilbio.2017.10.014
